# Supplementary material
Source: PubMed Central journal article supplement (PMC2655524)
Supplement: supp_191_7_2012__1.pdf [file supp_191_7_2012__1.pdf]

**Supplemental Material:** Mutations in *ampG* and lytic transglycosylase genes affect the net release of peptidoglycan monomers from *Vibrio fischeri*

D. M. Adin, J. T. Engle, W. E. Goldman, M. J. McFall-Ngai, and E. V. Stabb

**Supplemental Table S1.** PG biosynthesis and recycling protein homologs in *V. fischeri*

| Protein in <i>E. coli</i>                     | Function                                                                                      | ORF in <i>V. fischeri</i>                  |
|-----------------------------------------------|-----------------------------------------------------------------------------------------------|--------------------------------------------|
| <b>Biosynthesis</b>                           |                                                                                               |                                            |
| MurA                                          | UDP- <i>N</i> -acetylglucosamine enolpyruvyl transferase                                      | VF0401                                     |
| MurB                                          | UDP- <i>N</i> -acetylenolpyruvylglucosamine reductase                                         | VF2426                                     |
| MurC                                          | L-alanine ligase                                                                              | VF2200                                     |
| MurD                                          | D-glutamic acid ligase                                                                        | VF2203                                     |
| MurE                                          | <i>meso</i> -diaminopimelic acid ligase                                                       | VF2205                                     |
| MurF                                          | D-alanyl-D-alanine ligase                                                                     | VF2206                                     |
| MurG                                          | glycosyltransferase                                                                           | VF2201                                     |
| MraY                                          | undecaprenyl-phosphate phospho- <i>N</i> -acetylmuramoyl-pentapeptide transferase/translocase | VF2204                                     |
| Bactoprenol/UppS                              | undecaprenyl phosphate (C <sub>55</sub> -P)                                                   | VF2245                                     |
| <b>Periplasmic Incorporation and Cleavage</b> |                                                                                               |                                            |
| PBP1A                                         | transpeptidase/transglycosylase                                                               | VF2298                                     |
| PBP1B                                         | transpeptidase/transglycosylase                                                               | VF2162                                     |
| PBP1C                                         | unknown                                                                                       | ND <sup>a</sup>                            |
| PBP2                                          | transpeptidase/elongase                                                                       | VF0747                                     |
| PBP3                                          | transpeptidase                                                                                | VF2207                                     |
| PBP4                                          | endopeptidase                                                                                 | VF0474                                     |
| PBP5                                          | carboxypeptidase                                                                              | VF0745                                     |
| PBP6                                          | carboxypeptidase                                                                              | VF0724                                     |
| PBP7                                          | endopeptidase                                                                                 | ND <sup>a</sup>                            |
| MepA                                          | endopeptidase                                                                                 | ND <sup>a</sup>                            |
| MipA                                          | scaffolding protein for murein synthesis                                                      | VF1632                                     |
| AmiA                                          | <i>N</i> -acetylmuramyl-L-alanine amidase                                                     | ND <sup>a</sup>                            |
| AmiB                                          | <i>N</i> -acetylmuramyl-L-alanine amidase                                                     | VF2326                                     |
| AmiC                                          | <i>N</i> -acetylmuramyl-L-alanine amidase                                                     | ND <sup>a</sup>                            |
| AmiD                                          | <i>N</i> -acetylmuramyl-L-alanine amidase                                                     | ND <sup>a</sup>                            |
| Slt70/SltY                                    | Soluble lytic murein transglycosylase                                                         | VF0558 <sup>b</sup><br>VF1329 <sup>c</sup> |
| MltA                                          | membrane-bound lytic murein transglycosylase                                                  | VF0587                                     |
| MltB                                          | membrane-bound lytic murein transglycosylase                                                  | VF1702 <sup>d</sup>                        |
| MltC                                          | membrane-bound lytic murein transglycosylase                                                  | VF0419/420<br>VF1368                       |
| MltD                                          | membrane-bound lytic murein transglycosylase                                                  | VF1939 <sup>c</sup>                        |
| EmtA                                          | lytic murein endotransglycosylase                                                             | ND <sup>a</sup>                            |
| YfhD                                          | periplasmic binding protein/transglycosylase                                                  | VF0651                                     |
| AtlA                                          | <i>N</i> -acetylglucosaminidase                                                               | ND <sup>a</sup>                            |

| <b>Recycling</b> |                                                                                           |                 |
|------------------|-------------------------------------------------------------------------------------------|-----------------|
| AmpG             | muropeptide permease                                                                      | VF0720          |
| Opp              | oligopeptide permease                                                                     | VF681-VF677     |
| MppA             | murein tripeptide permease                                                                | VF1597          |
| LdcA             | L,D-carboxypeptidase                                                                      | ND <sup>a</sup> |
| AmpD             | <i>N</i> -acetylmuramyl-L-alanine amidase cytoplasmic                                     | VF2183          |
| NagA             | GlcNAc-6-P deacetylase                                                                    | VF0807          |
| NagK             | <i>N</i> -acetylglucosamine kinase                                                        | VF1408          |
| NagZ             | beta- <i>N</i> -acetylglucosaminidase                                                     | VFA0493         |
| AnmK             | anhydromuramic acid kinase                                                                | VFA0492         |
| MurQ             | <i>N</i> -acetylmuramic acid-6-phosphate etherase                                         | VF1114          |
| GlmM             | phosphoglucosamine mutase                                                                 | VF0481          |
| GlmU             | <i>N</i> -acetylglucosamine-1-PO <sub>4</sub> uridyltransferase                           | VF2562          |
| Mpl              | UDP- <i>N</i> -acetylmuramate: L-alanyl- $\gamma$ -D-glutamyl-meso-diaminopimelate ligase | VF0265          |

<sup>a</sup> ND indicates not detected; no significant homolog ( $e > 1^{-10}$ )

<sup>b</sup> Now designated *ltgA*

<sup>c</sup> Now designated *ltgY*

<sup>d</sup> Now designated *ltgD*

<sup>e</sup> Now designated *ltgE*
